# Supplementary material for: Multi-Clonal Live SARS-CoV-2 In Vitro Neutralization by Antibodies Isolated from Severe COVID-19 Convalescent Donors
Source: bioRxiv or medRxiv preprint supplement (doi:10.1101/2020.10.06.323634), 2020-10-06

# Supplementary Figure 1: Cloning and production of SARS-CoV-2 Spike Receptor Binding Domain (RBD) and human Angiotensin Converting Enzyme 2 (ACE2)

**a**

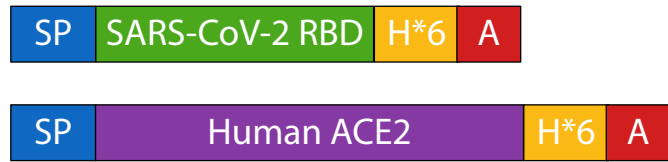

**b**

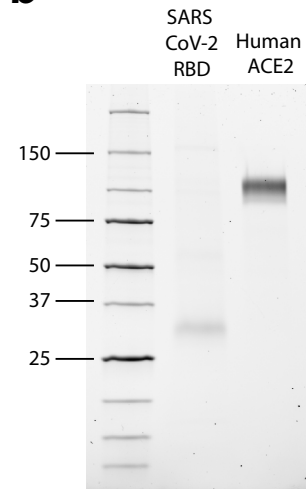

Supplement: Supplementary file [file media-1.pdf]
