# Supplementary material for: Multi-Clonal Live SARS-CoV-2 In Vitro Neutralization by Antibodies Isolated from Severe COVID-19 Convalescent Donors
Source: bioRxiv or medRxiv preprint supplement (doi:10.1101/2020.10.06.323634), 2020-10-06

# Supplementary Figure 3: IgG responses against OC43, 229E, CMV and HSV-1 in ELISA

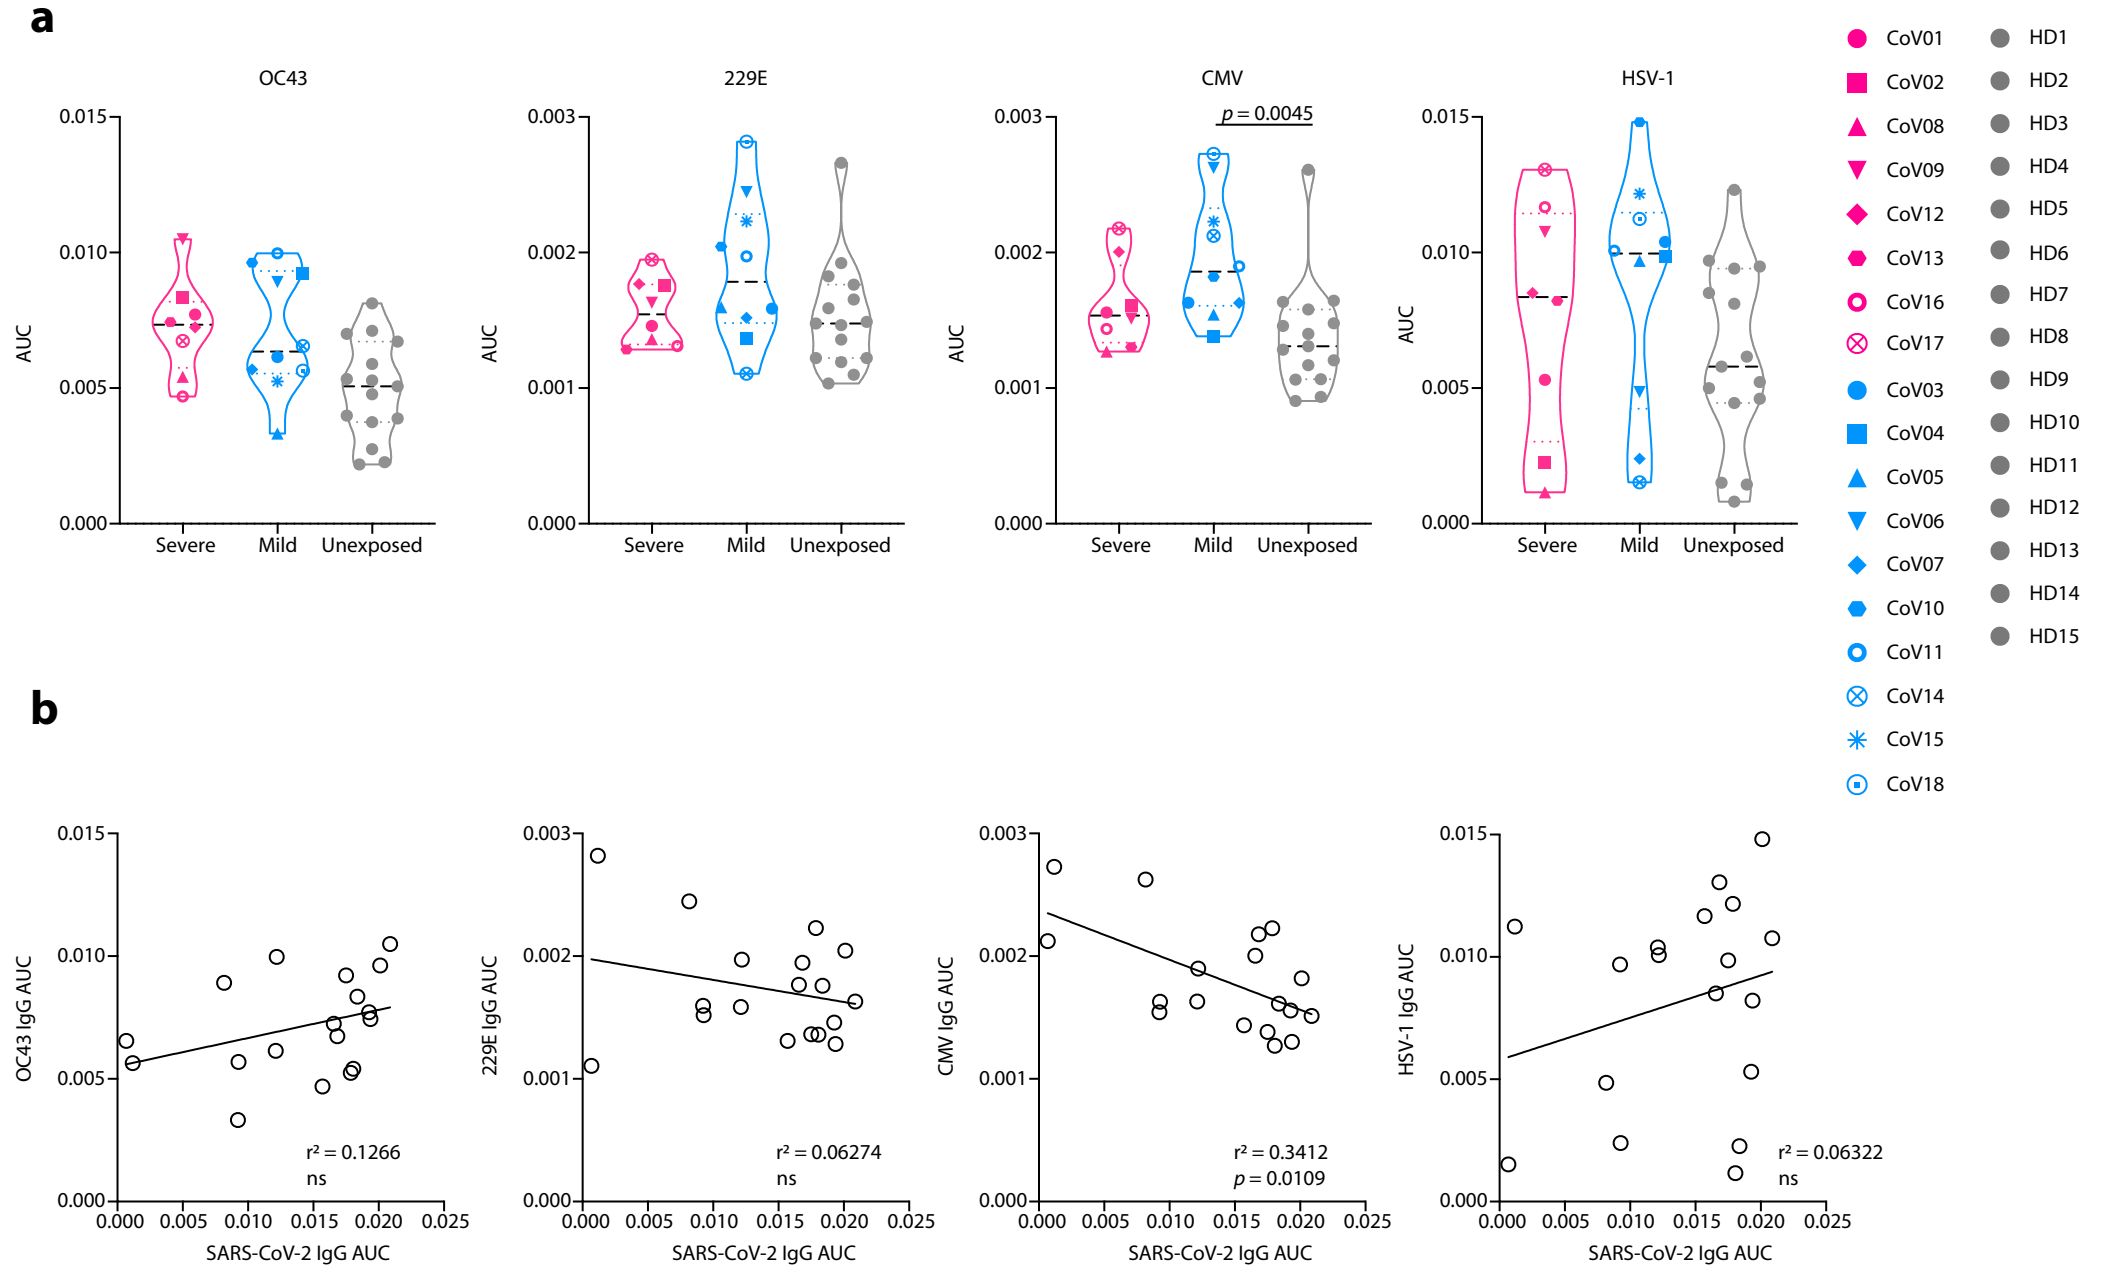

Supplement: Supplementary file [file media-3.pdf]
