# Supplementary material for: Multi-Clonal Live SARS-CoV-2 In Vitro Neutralization by Antibodies Isolated from Severe COVID-19 Convalescent Donors
Source: bioRxiv or medRxiv preprint supplement (doi:10.1101/2020.10.06.323634), 2020-10-06

# Supplementary Figure 4: RBD-positive memory B cells in donors CoV01-17

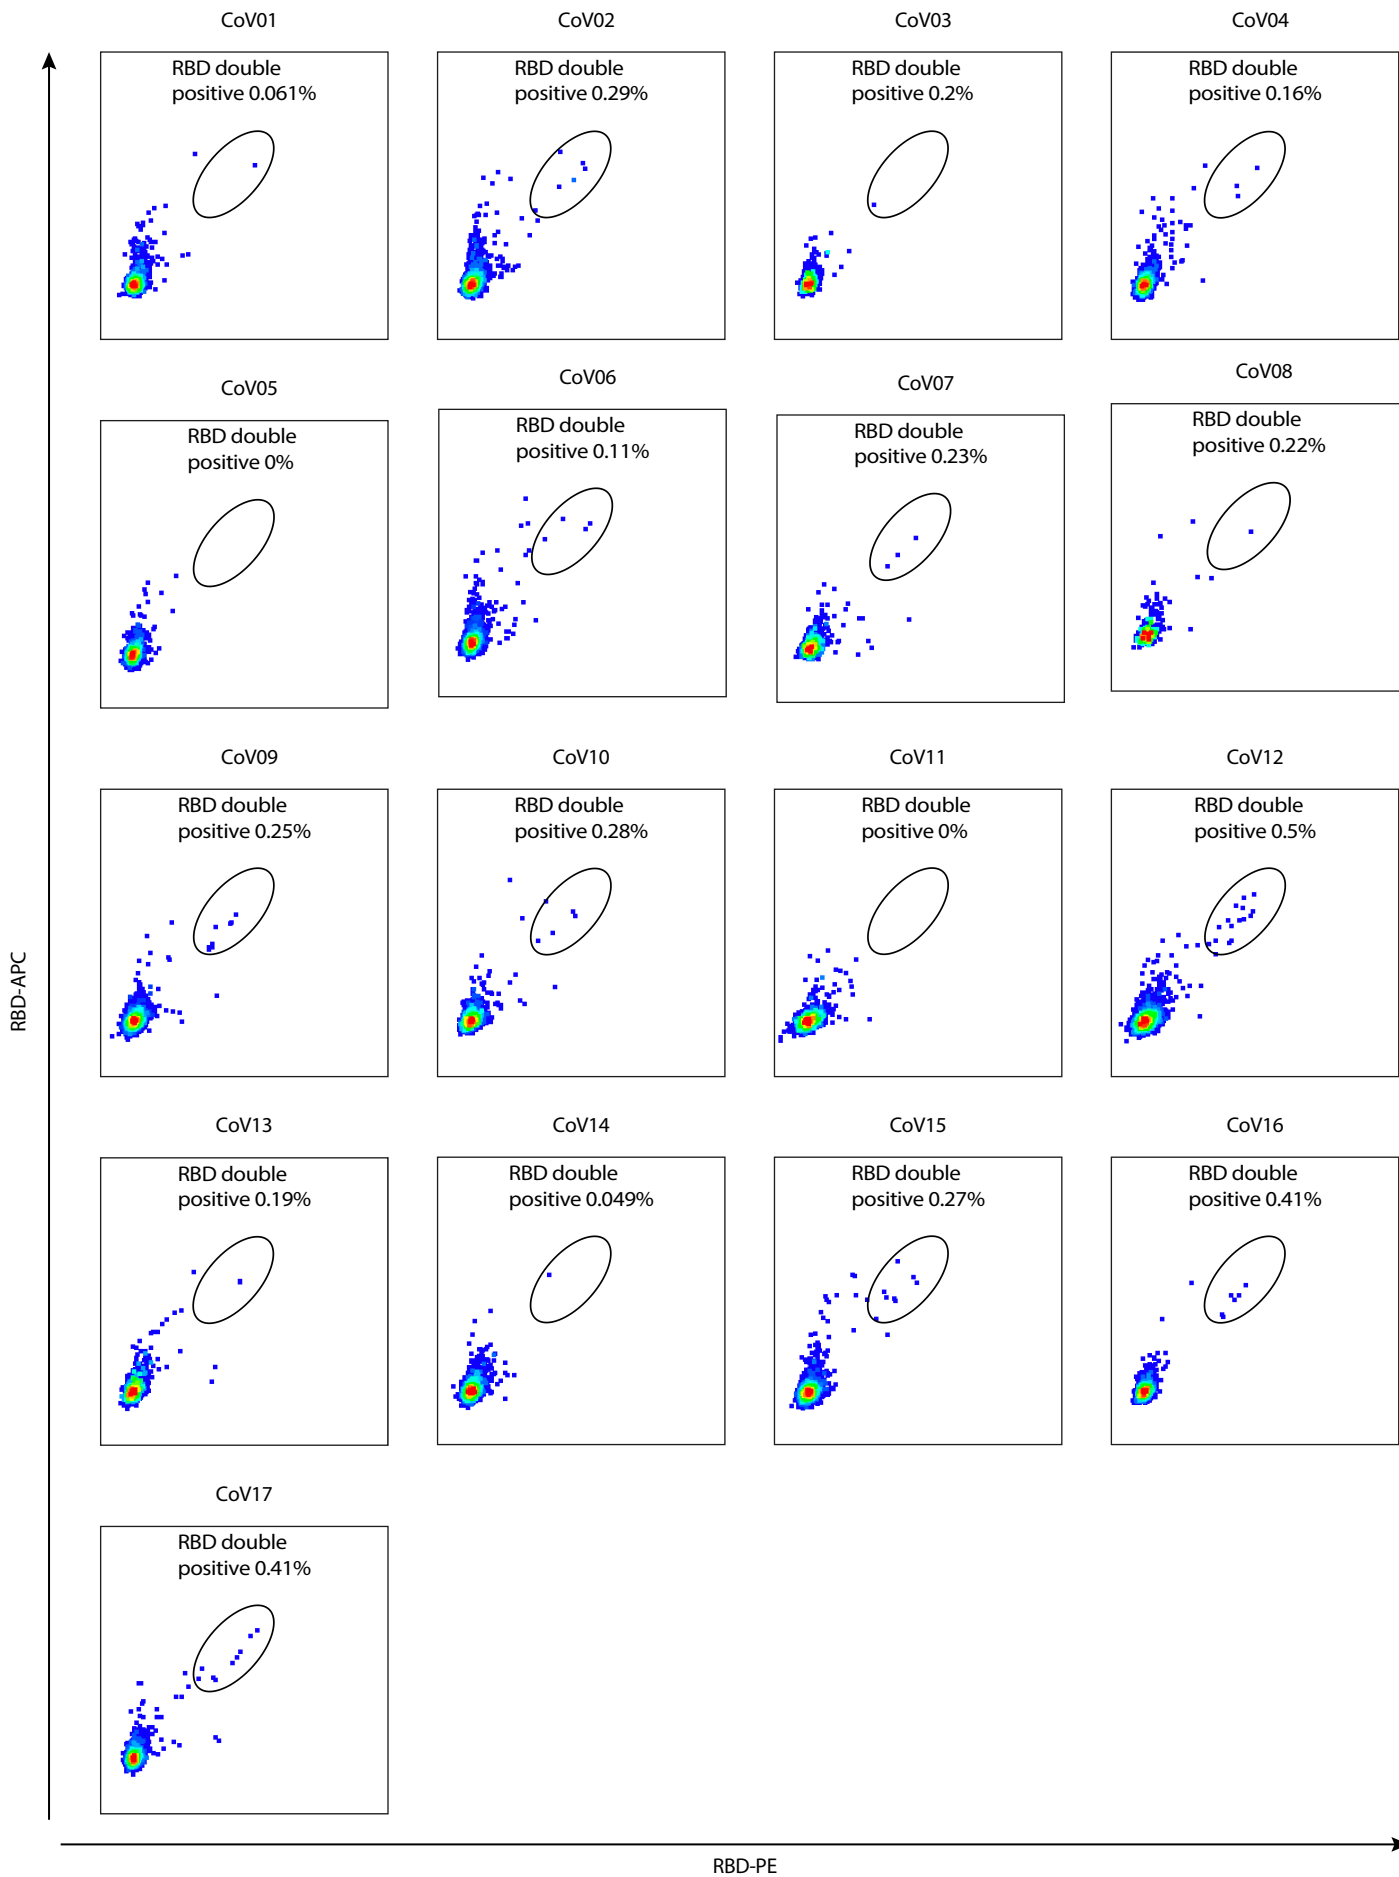

Supplement: Supplementary file [file media-4.pdf]
