# Supplementary material for: Multi-Clonal Live SARS-CoV-2 In Vitro Neutralization by Antibodies Isolated from Severe COVID-19 Convalescent Donors
Source: bioRxiv or medRxiv preprint supplement (doi:10.1101/2020.10.06.323634), 2020-10-06

## Supplementary Figure 11: Mapitope prediction of TAU-2230 epitope

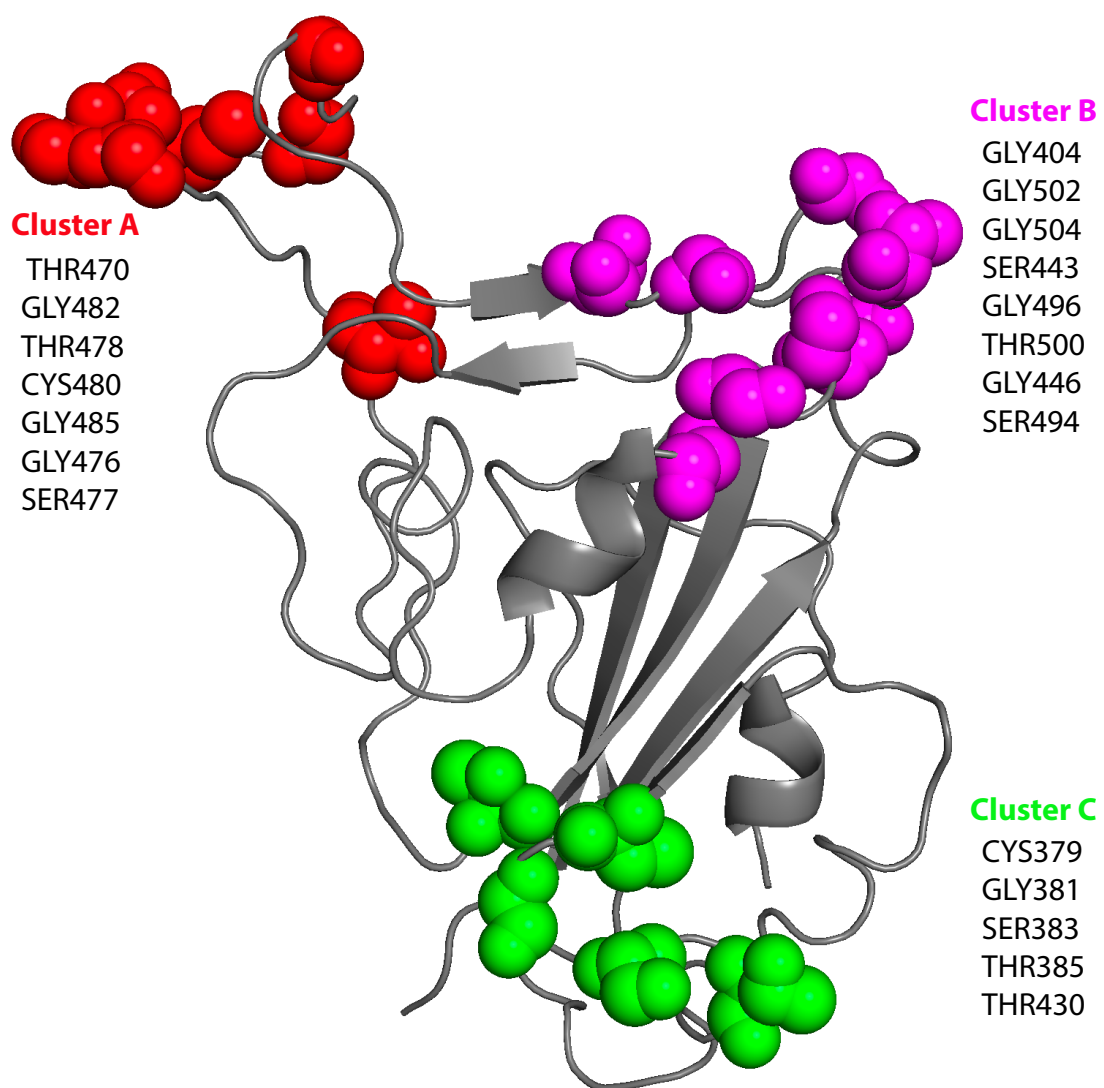

Supplement: Supplementary file [file media-11.pdf]
