# Supplementary material for: Multi-Clonal Live SARS-CoV-2 In Vitro Neutralization by Antibodies Isolated from Severe COVID-19 Convalescent Donors
Source: bioRxiv or medRxiv preprint supplement (doi:10.1101/2020.10.06.323634), 2020-10-06
Supplement: Supplementary file [file media-12.pdf]

# Supplementary Table 1: COVID-19 convalescent donors recruited for this study

| Patient | Age | M/F | Date    | Hospital | Disease severity | Cells (x10 <sup>6</sup> ) |
|---------|-----|-----|---------|----------|------------------|---------------------------|
| CoV001  | 41  | M   | 2.4.20  | Ichilov  | Severe           | 200                       |
| CoV002  | 40  | F   | 2.4.20  | Ichilov  | Severe           | 350                       |
| CoV003  | 31  | F   | 7.4.20  | Ichilov  | Mild             | 400                       |
| CoV004  | 37  | M   | 19.4.20 | Ichilov  | Mild             | 100                       |
| CoV005  | 26  | M   | 20.4.20 | Ichilov  | Mild             | 350                       |
| CoV006  | 38  | M   | 26.4.20 | Ichilov  | Mild             | 100                       |
| CoV007  | 37  | M   | 30.4.20 | Ichilov  | Mild             | 150                       |
| CoV008  | 56  | F   | 11.5.20 | Ichilov  | Severe           | 160                       |
| CoV009  | 63  | F   | 25.5.20 | Kaplan   | Severe           | 500                       |
| CoV010  | 65  | M   | 25.5.20 | Kaplan   | Mild             | 200                       |
| CoV011  | 53  | F   | 25.5.20 | Kaplan   | Mild             | 250                       |
| CoV012  | 62  | F   | 3.6.20  | Ichilov  | Severe           | 750                       |
| CoV013  | 62  | M   | 3.6.20  | Ichilov  | Severe           | 400                       |
| CoV014  | 48  | F   | 8.6.20  | Kaplan   | Mild             | 200                       |
| CoV015  | 51  | M   | 8.6.20  | Kaplan   | Mild             | 250                       |
| CoV016  | 50  | F   | 8.6.20  | Kaplan   | Severe           | 200                       |
| CoV017  | 59  | M   | 6.7.20  | Kaplan   | Severe           | 200                       |
| CoV018  | 45  | M   | 15.5.20 | Ichilov  | Mild             | -/-                       |
