# Supplementary material for: Multi-Clonal Live SARS-CoV-2 In Vitro Neutralization by Antibodies Isolated from Severe COVID-19 Convalescent Donors
Source: bioRxiv or medRxiv preprint supplement (doi:10.1101/2020.10.06.323634), 2020-10-06
Supplement: Supplementary file [file media-13.pdf]

# Supplementary Table 2: anti-SARS-CoV-2 monoclonal antibodies

|              | Antibody        | Closest VH | Closest VL | Somatic mutations in V(nt) % |                              | CDRH3 sequence               | CDRH3 length |
|--------------|-----------------|------------|------------|------------------------------|------------------------------|------------------------------|--------------|
|              |                 |            |            | VH                           | VL                           |                              |              |
| Donor CoV 01 | <b>TAU-1109</b> | 1-18       | K3-11      | 3                            | 2.1                          | <b>AREEPLYCSGGSCYEFQH</b>    | 18           |
|              | TAU-1110        | 3-15       | L1-47      | 6.3                          | 3.1                          | <b>TIDGRGYGYGYGMDV</b>       | 16           |
|              | <b>TAU-1115</b> | 3-23       | L3-21      | 2                            | 0.7                          | <b>AKDLTRDYYDSSGYQTGAFDI</b> | 21           |
|              | <b>TAU-1145</b> | 4-39       | L3-21      | 8.8                          | 7.3                          | <b>VRPNNEHGGFFFDY</b>        | 14           |
|              | TAU-1148        | 3-23       | K3-15      | 10.3                         | 6.6                          | <b>ARAGGSGTYPYYFDW</b>       | 15           |
|              | TAU-1225        | 3-23       | K2-30      | 5.5                          | 3.3                          | <b>ARKISTGNQYYYYGMDV</b>     | 17           |
|              | TAU-1236        | 1-18       | K1-39      | 4.4                          | 5.2                          | <b>ARVASILGATTRGFDS</b>      | 16           |
|              | TAU-1242        | 3-11       | L1-44      | 6.5                          | 6.1                          | <b>ARSTTVFAVRDYYYYMDV</b>    | 18           |
|              | TAU-1245        | 4-4        | L1-44      | 16.2                         | 10.2                         | <b>ARESSGVTMPGTSSAFFDP</b>   | 19           |
|              | TAU-2173        | 4-39       | L1-51      | 4                            | 1.7                          | <b>ARHRNRTPLDALDF</b>        | 11           |
| Donor CoV 02 | <b>TAU-2189</b> | 3-23       | L3-25      | 2                            | 0.7                          | <b>AKDMDIVVVITGDAFDI</b>     | 17           |
|              | <b>TAU-2230</b> | 3-23       | L3-25      | 1.4                          | 2.8                          | <b>AKDLDIVVVITGDAFDI</b>     | 17           |
|              | <b>TAU-2212</b> | 1-2        | L3-23      | 0                            | 0.7                          | <b>ARGWATYYDILTGYSLFDY</b>   | 19           |
|              | TAU-2218        | 3-49       | K3-20      | 0                            | 5.6                          | <b>TGPRPYYDSSGYYPYYFDY</b>   | 19           |
|              | TAU-2220        | 1-46       | L1-44      | 3.4                          | 2.4                          | <b>ARTHVAQLWEIWFYDI</b>      | 16           |
|              | TAU-2247        | 3-9        | L3-21      | 10.1                         | 9.4                          | <b>AKDRGAALSRLRGMDA</b>      | 16           |
|              | TAU-2255        | 3-9        | L3-21      | 11.4                         | 11.1                         | <b>AKDRGAALSRLRGMDA</b>      | 16           |
|              | <b>TAU-2303</b> | 3-66       | K1-9       | 2                            | 1.4                          | <b>ARDLAVYGMMDV</b>          | 11           |
|              | <b>TAU-2310</b> | 3-23       | L2-14      | 3.7                          | 1.7                          | <b>AKGAAPYYYYYYYGMDV</b>     | 16           |
|              | TAU-2312        | 4-34       | L1-36      | 4.5                          | 4.8                          | <b>ARPLGYCSGRKCERKEMYY</b>   | 19           |
| TAU-2381     | 3-21            | L4-60      | 3.7        | 1.3                          | <b>AREGTRYDYVWGSYRPWELDY</b> | 21                           |              |
| TAU-2383     | 3-66            | K1-39      | 5.8        | 5.8                          | <b>ARTRVGSGWDAFDV</b>        | 14                           |              |
